# Supplementary material for: The Inuit gut microbiome is dynamic over time and shaped by traditional foods
Source: Microbiome. 2017 Nov 16;5:151. doi: 10.1186/s40168-017-0370-7 (PMC5689144; doi:10.1186/s40168-017-0370-7)
Supplement: Supplementary file 1 — Supplementary Tables S1 to S6. (XLSX 29 kb) [file 40168_2017_370_MOESM1_ESM.xlsx]

## Sheet: Legend
Supplementary Tables
	Tables Legend
	Supplementary Table S1
	Seasons of Nunavut
	Definitions of seasons in Nunavut (From Hay et al. 2000) and number of samples collected for each seasons in our study.
	Supplementary Table S2:
	Primer sequences.
	Primers names and DNA sequences used in the two-step PCR method for library preparation.
	Supplementary Table S3:
	Pooled food categories.
	Dietary categories from merged food types, based on dietary habit questionnaires.
	Supplementary Table S4:
	Differentially abundant taxa between stool and toilet paper samples.
	Bacterial taxa identified as more prevalent by LEfSe analysis (LDA score > 2) in either stool or toilet paper samples are shown, along with their associated LDA score.
	Supplementary Table S5:
	Differentially abundant taxa between sexes.
	Bacterial taxa identified by LEfSe (LDA score > 2) as being associated with host sex, and their associated LDA score. Taxa identified as associated with toilet paper (Table S1) are shown in bold.
	Supplementary Table S6:
	Differentially abundant taxa between Nunavut and Montréal samples.
	Bacterial taxa identified as more prevalent by LEfSe analysis (LDA score > 2) in either Nunavut or Montréal samples are shown, along with their associated LDA score.

## Sheet: Supp Table S1
Supplementary Table S1
	Season	Months	Characteristics (From Hay et al. 2000)	Number of samples collected
	Winter	Early Januray to mid-March	Extensive sea ice, continues to thicken and coalesce; snow on land and ice; short daylight, sun returning; very cold.	4
	Early spring	Mid-March to late May	Maximum sea ice cover and thickness; snow on land and ice; daylight period long and increasing.	0
	Spring	Late May to mid-July	Progressive snowmelt on land; widening of ice leads, disapperance of ice; 24-h daylight.	20
	Summer	Mid-July to early September	Open water, some drifting ice; daylight period long, but decreasing.	14
	Early fall	Early September to late October	Open water, ice starting to form late in season along the shore; snow on land; lake ice; daylight period short and decreasing.	13
	Fall	Late October to early January	New ice thickens and hardens to form extensive areas of land-fast or drifting pack ice; snow on land and ice; 24-h darkness.	10

## Sheet: Supp Table S2
Supplementary Table S2
		Primer	Sequence
	Step 1	PE16S_V4_U515_F	5′ ACACG ACGCT CTTCC GATCT YRYRG TGCCA GCMGC CGCGG TAA-3′
		PE16S_V4_E786_R	5′-CGGCA TTCCT GCTGA ACCGC TCTTC CGATC TGGAC TACHV GGGTW TCTAA T 3′
	Step 2	PE-III-PCR-F	5′-AATGA TACGG CGACC ACCGA GATCT ACACT CTTTC CCTAC ACGAC GCTCT TCCGA TCT 3′
		PE-III- PCR-001-096	5′-CAAGC AGAAG ACGGC ATACG AGATN NNNNN NNNCG GTCTC GGCAT TCCTG CTGAA CCGCT CTTCC GATCT 3′
	** Ns represent unique barcode

## Sheet: Supp Table S3
Supplementary Table S3
	Dietary Category	Food type
	Alcohol	Alcohol
	Coffee	Coffee
	Cooked fish	Cooked market fish; Cooked arctic char; Cooked other fish
	Cooked meat	Chicken; Turkey; Cowmeat; Porkmeat; Other mammal
	Dairy Products	Cheese; Yogurt; Evaporated milk; Milk; Ice cream
	Eggs	Raw eggs; Cooked eggs
	Fermented meat	Fermented meat
	Fruits and Veggies	Fruits and Veggies
	Grains	Cereal; Bannock; Oatmeal; Brown rice; Brown bread; White rice; White bread; Pasta
	Raw fish	Raw market fish; Raw arctic char; Raw other fish
	Raw game meat	Caribou; Seal; Walrus; Whale; Ptarmigan; Goose or duck
	Seafood	Raw oysters, mussels, scallops; Cooked oysters, mussels, scallops; Other seafood
	Refined sugar	Candy, chocolate; donuts, cake, cookies
	Sweetened drink	Soft drink; Fruit juice
	Tea	Green tea; Black tea

## Sheet: Supp Table S4
Supplementary Table S4
	LEfSe biomarkers across sampling methods	Stool samples	LDA score
		Taxa
		Bacteria.Firmicutes.Clostridia.Clostridiales.Ruminococcaceae	4.54
		Bacteria.Actinobacteria.Actinobacteria.Bifidobacteriales.Bifidobacteriaceae.Bifidobacterium	3.96
		Bacteria.Bacteroidetes.Bacteroidia.Bacteroidales.Rikenellaceae	3.49
		Archaea.Euryarchaeota.Methanobacteria.Methanobacteriales.Methanobacteriaceae.Methanobrevibacter	3.40
		Bacteria.Cyanobacteria.Chloroplast.Streptophyta	3.30
		Bacteria.Firmicutes.Bacilli.Lactobacillales.Other.Other	3.14
		Bacteria.Firmicutes.Clostridia.Clostridiales.Lachnospiraceae.Coprococcus	3.03
		Bacteria.Firmicutes.Clostridia.Clostridiales.Clostridiaceae	2.94
		Archaea.Euryarchaeota.Methanobacteria.Methanobacteriales.Methanobacteriaceae.Methanosphaera	2.53
		Bacteria.TM7.TM73	2.14
		Toilet paper samples	LDA score
		Taxa
		Bacteria.Bacteroidetes.Bacteroidia.Bacteroidales.Prevotellaceae.Prevotella	4.54
		Bacteria.Actinobacteria.Actinobacteria.Bifidobacteriales.Bifidobacteriaceae.Other	4.50
		Bacteria.Firmicutes.Clostridia.Clostridiales.Veillonellaceae.Megasphaera	4.12
		Bacteria.Firmicutes.Clostridia.Clostridiales.Tissierellaceae.WAL1855D	3.55
		Bacteria.Firmicutes.Clostridia.Clostridiales.Tissierellaceae.Anaerococcus	3.48
		Bacteria.Bacteroidetes.Bacteroidia.Bacteroidales.Porphyromonadaceae.Porphyromonas	3.47
		Bacteria.Proteobacteria.Betaproteobacteria.Burkholderiales.Alcaligenaceae.Sutterella	3.47
		Bacteria.Firmicutes.Clostridia.Clostridiales.Tissierellaceae.Peptoniphilus	3.44
		Bacteria.Firmicutes.Clostridia.Clostridiales.Veillonellaceae.Dialister	3.30
		Bacteria.Firmicutes.Clostridia.Clostridiales.Clostridiaceae.Clostridium	3.17
		Bacteria.Firmicutes.Clostridia.Clostridiales.Tissierellaceae.168	3.04
		Bacteria.Firmicutes.Clostridia.Clostridiales.Tissierellaceae.Finegoldia	3.01
		Bacteria.Firmicutes.Bacilli.Lactobacillales.Aerococcaceae.Aerococcus	2.90
		Bacteria.Firmicutes.Clostridia.Clostridiales.Lachnospiraceae.Moryella	2.87
		Bacteria.Firmicutes.Clostridia.Clostridiales.Tissierellaceae.Parvimonas	2.81
		Bacteria.Firmicutes.Clostridia.Clostridiales.Tissierellaceae.ph2	2.81
		Bacteria.Firmicutes.Clostridia.Clostridiales.Mogibacteriaceae.Other	2.80
		Bacteria.Firmicutes.Clostridia.Clostridiales.Peptostreptococcaceae.Peptostreptococcus	2.73
		Bacteria.Actinobacteria.Actinobacteria.Actinomycetales.Corynebacteriaceae.Corynebacterium	2.72
		Bacteria.Firmicutes.Clostridia.Clostridiales.Veillonellaceae.Other	2.72
		Bacteria.Firmicutes.Clostridia.Clostridiales.Tissierellaceae.Gallicola	2.64
		Bacteria.Proteobacteria.Epsilonproteobacteria.Campylobacterales.Campylobacteraceae.Campylobacter	2.63
		Bacteria.Firmicutes.Bacilli.Gemellales.Gemellaceae.Gemella	2.60
		Bacteria.Firmicutes.Clostridia.Clostridiales.Tissierellaceae.Other	2.59
		Bacteria.Actinobacteria.Actinobacteria.Actinomycetales.Actinomycetaceae.Mobiluncus	2.58
		Bacteria.Actinobacteria.Actinobacteria.Actinomycetales.Actinomycetaceae.Varibaculum	2.56
		Bacteria.TM7.TM73.I025.Rs045	2.47

## Sheet: Supp Table S5
Supplementary Table S5
	LEfSe biomarkers across sex	Female samples	LDA score
		Taxa
		Bacteria.Actinobacteria.Actinobacteria.Bifidobacteriales.Bifidobacteriaceae.Other	4.36
		Bacteria.Firmicutes.Clostridia.Clostridiales.Other	4.14		Legend
		Bacteria.Firmicutes.Clostridia.Clostridiales.Veillonellaceae.Megasphaera	3.78
		Bacteria.Fusobacteria.Fusobacteriia.Fusobacteriales.Leptotrichiaceae.Sneathia	3.70			OTUs associated with toilet paper samples
		Bacteria.Firmicutes.Bacilli.Lactobacillales.Lactobacillaceae.Lactobacillus	3.52
		Bacteria.Bacteroidetes.Bacteroidia.Bacteroidales.S247	3.39
		Bacteria.Spirochaetes.Brachyspirae.Brachyspirales.Brachyspiraceae.Brachyspira	3.18
		Bacteria.Firmicutes.Clostridia.Clostridiales.Ruminococcaceae.Other	3.17
		Bacteria.Firmicutes.Erysipelotrichi.Erysipelotrichales.Erysipelotrichaceae.Eubacterium	3.08
		Bacteria.Firmicutes.Clostridia.Clostridiales.Lachnospiraceae.Shuttleworthia	2.95
		Bacteria.Actinobacteria.Coriobacteriia.Coriobacteriales.Coriobacteriaceae.Adlercreutzia	2.84
		Bacteria.Firmicutes.Clostridia.Clostridiales.Veillonellaceae.Megamonas	2.83
		Bacteria.Synergistetes.Synergistia.Synergistales.Synergistaceae.Other	2.67
		Bacteria.Actinobacteria.Actinobacteria.Actinomycetales.Micrococcaceae.Rothia	2.54
		Bacteria.Firmicutes.Clostridia.Clostridiales.Lachnospiraceae.Moryella	2.46
		Bacteria.Proteobacteria.Alphaproteobacteria.RF32	2.46
		Bacteria.Tenericutes.Mollicutes.Mycoplasmatales.Mycoplasmataceae.Ureaplasma	2.38
		Bacteria.Actinobacteria.Actinobacteria.Actinomycetales.Actinomycetaceae.Other	2.35
		Bacteria.Firmicutes.Bacilli.Gemellales.Gemellaceae.Gemella	2.28
		Bacteria.Firmicutes.Clostridia.Clostridiales.Ruminococcaceae.Anaerotruncus	2.28
		Bacteria.Firmicutes.Bacilli.Lactobacillales.Aerococcaceae.aerococcus	2.21
		Bacteria.Proteobacteria.Gammaproteobacteria.Aeromonadales.Succinivibrionaceae	2.15
		Bacteria.Firmicutes.Clostridia.Clostridiales.Peptococcaceae.Peptococcus	2.06
		Bacteria.Actinobacteria.Actinobacteria.Actinomycetales.Actinomycetaceae.Arcanobacterium	2.03
		Male samples	LDA score
		Taxa
		Bacteria.Bacteroidetes.Bacteroidia.Bacteroidales.Prevotellaceae.Prevotella	4.81
		Bacteria.Actinobacteria.Actinobacteria.Bifidobacteriales.Bifidobacteriaceae.Bifidobacterium	3.73
		Bacteria.Firmicutes.Clostridia.Clostridiales.Ruminococcaceae.Faecalibacterium	3.65
		Bacteria.Bacteroidetes.Bacteroidia.Bacteroidales.Barnesiellaceae	3.42
		Bacteria.Proteobacteria.Betaproteobacteria.Burkholderiales.Alcaligenaceae.Sutterella	3.20
		Bacteria.Firmicutes.Clostridia.Clostridiales.Veillonellaceae.Phascolarctobacterium	3.12
		Bacteria.Bacteroidetes.Bacteroidia.Bacteroidales.Paraprevotellaceae.Other	3.02
		Bacteria.Firmicutes.Clostridia.Clostridiales.Lachnospiraceae.Lachnospira	2.89
		Bacteria.Actinobacteria.Coriobacteriia.Coriobacteriales.Coriobacteriaceae.Collinsella	2.86
		Bacteria.Bacteroidetes.Bacteroidia.Bacteroidales.Paraprevotellaceae.Paraprevotella	2.86
		Bacteria.Tenericutes.Mollicutes.Anaeroplasmatales.Anaeroplasmataceae	2.54
		Bacteria.Proteobacteria.Betaproteobacteria.Burkholderiales.Alcaligenaceae.Other	2.53
		Bacteria.Proteobacteria.Betaproteobacteria.Burkholderiales.Comamonadaceae	2.50
		Bacteria.Firmicutes.Bacilli.Turicibacterales.Turicibacteraceae.Turicibacter	2.48
		Bacteria.Actinobacteria.Coriobacteriia.Coriobacteriales.Coriobacteriaceae.Slackia	2.10
		Bacteria.Firmicutes.Clostridia.Clostridiales.Peptococcaceae	2.05

## Sheet: Supp Table S6
Supplementary Table S6
	LEfSe biomarkers across geography	Nunavut biomarkers	LDA score
		Taxa
		Bacteria.Bacteroidetes.Bacteroidia.Bacteroidales.S247	4.01139963687
		Bacteria.Bacteroidetes.Bacteroidia.Bacteroidales	3.9414620734
		Bacteria.Actinobacteria.Actinobacteria.Bifidobacteriales.Bifidobacteriaceae.Other	3.83394178509
		Bacteria.Firmicutes.Bacilli	3.8335859717		Legend
		Bacteria.Firmicutes.Clostridia.Clostridiales.Veillonellaceae.Megasphaera	3.67115330482
		Bacteria.Bacteroidetes.Bacteroidia.Bacteroidales.Paraprevotellaceae.Prevotella	3.66400908886			OTUs associated with Nunavut samples (Girard et al. 2017)
		Bacteria.Fusobacteria	3.63457859339
		Bacteria.Fusobacteria.Fusobacteriia	3.63033433165			OTUs associated with western diet in Nunavut (Girard et al. 2017)
		Bacteria.Fusobacteria.Fusobacteriia.Fusobacteriales	3.62689397063
		Bacteria.Actinobacteria.Coriobacteriia.Coriobacteriales	3.61678348476			Inuit diet biomarkers (Girard et al. 2017)
		Bacteria.Actinobacteria.Coriobacteriia	3.61678348476
		Bacteria.Fusobacteria.Fusobacteriia.Fusobacteriales.Leptotrichiaceae.Sneathia	3.50024510726
		Bacteria.Fusobacteria.Fusobacteriia.Fusobacteriales.Leptotrichiaceae	3.49735650252
		Bacteria.Firmicutes.Clostridia.Clostridiales.Lachnospiraceae.Ruminococcus	3.48829104173
		Bacteria.Firmicutes.Erysipelotrichi	3.48377918504
		Bacteria.Firmicutes.Erysipelotrichi.Erysipelotrichales	3.48377918504
		Bacteria.Firmicutes.Erysipelotrichi.Erysipelotrichales.Erysipelotrichaceae.Catenibacterium	3.46568897792
		Bacteria.Bacteroidetes.Bacteroidia.Bacteroidales.Porphyromonadaceae.Parabacteroides	3.45254851289
		Bacteria.Actinobacteria.Coriobacteriia.Coriobacteriales.Coriobacteriaceae	3.38351438222
		Bacteria.Firmicutes.Erysipelotrichi.Erysipelotrichales.Erysipelotrichaceae.Eubacterium	3.35756705919
		Bacteria.Firmicutes.Clostridia.Clostridiales.Lachnospiraceae.Shuttleworthia	3.03726327251
		Bacteria.Fusobacteria.Fusobacteriia.Fusobacteriales.Fusobacteriaceae	3.01554698283
		Bacteria.Fusobacteria.Fusobacteriia.Fusobacteriales.Fusobacteriaceae.Fusobacterium	3.00485066751
		Bacteria.Firmicutes.Bacilli.Lactobacillales.Lactobacillaceae.Lactobacillus	2.9492353111
		Bacteria.Bacteroidetes.Bacteroidia.Bacteroidales.Odoribacteraceae	2.91250185162
		Bacteria.Actinobacteria.Actinobacteria.Actinomycetales.Actinomycetaceae	2.89026127982
		Bacteria.Firmicutes.Erysipelotrichi.Erysipelotrichales.Erysipelotrichaceae.Coprobacillus	2.77164966767
		Bacteria.Bacteroidetes.Bacteroidia.Bacteroidales.Odoribacteraceae.Butyricimonas	2.72415738499
		Bacteria.Firmicutes.Clostridia.Clostridiales.Eubacteriaceae.Anaerofustis	2.69674514226
		Bacteria.Firmicutes.Clostridia.Clostridiales.Christensenellaceae.Christensenella	2.63005946662
		Bacteria.Actinobacteria.Actinobacteria.Actinomycetales.Actinomycetaceae.Other	2.58999681516
		Bacteria.Firmicutes.Clostridia.Clostridiales.Eubacteriaceae	2.53774941874
		Bacteria.Tenericutes.Mollicutes.Mycoplasmatales.Mycoplasmataceae.Mycoplasma	2.53016437739
		Bacteria.Firmicutes.Clostridia.Clostridiales.Peptococcaceae.Peptococcus	2.50833260434
		Bacteria.Firmicutes.Clostridia.Clostridiales.Ruminococcaceae.Anaerotruncus	2.50588127787
		Bacteria.Actinobacteria.Coriobacteriia.Coriobacteriales.Coriobacteriaceae.Adlercreutzia	2.47783345894
		Bacteria.Firmicutes.Clostridia.Clostridiales.Lachnospiraceae.Butyrivibrio	2.46032898377
		Bacteria.Firmicutes.Clostridia.Clostridiales.Tissierellaceae.Parvimonas	2.45267507063
		Bacteria.Firmicutes.Bacilli.Gemellales	2.43422709056
		Bacteria.Proteobacteria.Gammaproteobacteria.Aeromonadales	2.36404097146
		Bacteria.Tenericutes.Mollicutes.Mycoplasmatales.Mycoplasmataceae	2.351930896
		Bacteria.Firmicutes.Bacilli.Gemellales.Gemellaceae.Gemella	2.34493110184
		Bacteria.Proteobacteria.Gammaproteobacteria.Aeromonadales.Succinivibrionaceae.Anaerobiospirillum	2.34166139095
		Bacteria.Tenericutes.Mollicutes.Mycoplasmatales	2.32560271417
		Bacteria.Actinobacteria.Coriobacteriia.Coriobacteriales.Coriobacteriaceae.Eggerthella	2.22619711211
		Bacteria.Proteobacteria.Gammaproteobacteria.Enterobacteriales.Enterobacteriaceae.Citrobacter	2.21397147812
		Bacteria.Verrucomicrobia.Opitutae	2.20584907602
		Bacteria.Verrucomicrobia.Opitutae.Cerasicoccales.Cerasicoccaceae	2.18508274515
		Bacteria.Verrucomicrobia.Opitutae.Cerasicoccales	2.15986725401
		Bacteria.TM7.TM73.I025	2.145702794
		Bacteria.TM7.TM73.I025.Rs045	2.14430345628
		Bacteria.Firmicutes.Bacilli.Lactobacillales.Aerococcaceae.Aerococcus	2.1421697917
		Bacteria.Proteobacteria.Gammaproteobacteria.Pseudomonadales.Moraxellaceae	2.13402859578
		Bacteria.Firmicutes.Erysipelotrichi.Erysipelotrichales.Erysipelotrichaceae.Bulleidia	2.12722827019
		Bacteria.Actinobacteria.Actinobacteria.Actinomycetales.Actinomycetaceae.Arcanobacterium	2.08505419731
		Bacteria.Proteobacteria.Gammaproteobacteria.Pseudomonadales.Moraxellaceae.Acinetobacter	2.08087085236
		Bacteria.Proteobacteria.Gammaproteobacteria.Enterobacteriales.Enterobacteriaceae.Other	2.0628358021
	LEfSe biomarkers across geography	Montréal	LDA score
		Taxa
		Bacteria.Firmicutes.Clostridia	4.51546882159
		Bacteria.Firmicutes	4.36000852598
		Bacteria.Firmicutes.Clostridia.Clostridiales	4.05294464594
		Bacteria.Firmicutes.Clostridia.Clostridiales.Ruminococcaceae.Faecalibacterium	4.03901923382
		Bacteria.Firmicutes.Clostridia.Clostridiales.Ruminococcaceae	3.92885447779
		Bacteria.Bacteroidetes.Bacteroidia.Bacteroidales.Barnesiellaceae	3.72603093239
		Bacteria.Firmicutes.Clostridia.Clostridiales.Lachnospiraceae	3.63909685894
		Bacteria.Firmicutes.Clostridia.Clostridiales.Ruminococcaceae.Ruminococcus	3.61779449839
		Bacteria.Firmicutes.Clostridia.Clostridiales.Lachnospiraceae.Lachnospira	3.56317741783
		Bacteria.Firmicutes.Erysipelotrichi.Erysipelotrichales.Erysipelotrichaceae	3.46040374299
		Bacteria.Actinobacteria.Actinobacteria.Actinomycetales.Corynebacteriaceae	3.44071347723
		Bacteria.Actinobacteria.Actinobacteria.Actinomycetales.Corynebacteriaceae.Corynebacterium	3.44002600452
		Bacteria.Actinobacteria.Actinobacteria.Bifidobacteriales.Bifidobacteriaceae.Bifidobacterium	3.41754032156
		Bacteria.Firmicutes.Clostridia.Clostridiales.Tissierellaceae.ph2	3.33295292458
		Bacteria.Firmicutes.Clostridia.Clostridiales.Lachnospiraceae.Coprococcus	3.31842293879
		Bacteria.Tenericutes.Mollicutes	3.18801779674
		Bacteria.Tenericutes.Mollicutes.RF39	3.1862287022
		Bacteria.Firmicutes.Clostridia.Clostridiales.Lachnospiraceae.Anaerostipes	2.99895033301
		Bacteria.Firmicutes.Clostridia.Clostridiales.Veillonellaceae	2.92195662913
		Bacteria.Actinobacteria.Actinobacteria.Actinomycetales.Actinomycetaceae.Mobiluncus	2.84817221717
		Bacteria.Firmicutes.Clostridia.Clostridiales.Mogibacteriaceae	2.76338497139
		Bacteria.Proteobacteria.Alphaproteobacteria	2.73631512384
		Bacteria.Proteobacteria.Alphaproteobacteria.RF32	2.73015638741
		Bacteria.Actinobacteria.Actinobacteria.Actinomycetales.Propionibacteriaceae	2.65897428409
		Bacteria.Proteobacteria.Epsilonproteobacteria.Campylobacterales.Campylobacteraceae	2.59098691525
		Bacteria.Proteobacteria.Epsilonproteobacteria.Campylobacterales	2.58880416017
		Bacteria.Proteobacteria.Epsilonproteobacteria	2.57317343436
		Bacteria.Proteobacteria.Epsilonproteobacteria.Campylobacterales.Campylobacteraceae.Campylobacter	2.57053080504
		Bacteria.Firmicutes.Clostridia.Clostridiales.Mogibacteriaceae.Mogibacterium	2.50678339063
		Bacteria.Proteobacteria.Betaproteobacteria.Burkholderiales.Comamonadaceae	2.47877503658
		Bacteria.Proteobacteria.Betaproteobacteria.Burkholderiales.Oxalobacteraceae	2.46629901572
		Bacteria.Proteobacteria.Betaproteobacteria.Burkholderiales.Alcaligenaceae.Other	2.38753927719
		Bacteria.Tenericutes.Mollicutes.Anaeroplasmatales.Anaeroplasmataceae	2.38169386571
		Bacteria.Tenericutes.Mollicutes.Anaeroplasmatales	2.37057191786
		Bacteria.Lentisphaerae	2.3153019526
		Bacteria.Proteobacteria.Gammaproteobacteria.Pasteurellales	2.30733505528
		Bacteria.Proteobacteria.Gammaproteobacteria.Pasteurellales.Pasteurellaceae	2.29442466959
		Bacteria.Lentisphaerae.Lentisphaeria	2.27112883043
		Bacteria.Firmicutes.Bacilli.Turicibacterales.Turicibacteraceae	2.26664926211
		Bacteria.Actinobacteria.Actinobacteria.Actinomycetales.Dermabacteraceae.Other	2.26216023465
		Bacteria.Firmicutes.Clostridia.Clostridiales.Peptococcaceae.rc44	2.26190747709
		Bacteria.Lentisphaerae.Lentisphaeria.Victivallales.Victivallaceae	2.25963135294
		Bacteria.Lentisphaerae.Lentisphaeria.Victivallales	2.25811406339
		Bacteria.Firmicutes.Bacilli.Turicibacterales.Turicibacteraceae.Turicibacter	2.25253099961
		Bacteria.Firmicutes.Bacilli.Turicibacterales	2.24401047219
		Bacteria.Proteobacteria.Gammaproteobacteria.Pasteurellales.Pasteurellaceae.Haemophilus	2.22367754472
		Bacteria.Actinobacteria.Actinobacteria.Actinomycetales.Brevibacteriaceae.Brevibacterium	2.1689470851
		Bacteria.Actinobacteria.Actinobacteria.Actinomycetales.Dermabacteraceae	2.1593012199
		Bacteria.Actinobacteria.Actinobacteria.Actinomycetales.Brevibacteriaceae	2.15083278594
		Bacteria.Elusimicrobia.Elusimicrobia	2.13978498745
		Bacteria.Actinobacteria.Actinobacteria.Actinomycetales.Dermabacteraceae.Dermabacter	2.109595593
		Bacteria.Firmicutes.Clostridia.Clostridiales.Veillonellaceae.Veillonella	2.08297557497
		Bacteria.TM7.TM73	2.07075027708
		Bacteria.Elusimicrobia.Elusimicrobia.Elusimicrobiales	2.05809192485
		Bacteria.Elusimicrobia	2.0561382672
		Bacteria.Elusimicrobia.Elusimicrobia.Elusimicrobiales.Elusimicrobiaceae	2.05589079712
		Bacteria.Firmicutes.Clostridia.Clostridiales.Peptococcaceae	2.0049853941
